# Supplementary material
Source: HighWire-hosted journal article supplement (https://www.genetics.org/content/suppl/2010/05/18/genetics.110.116111)

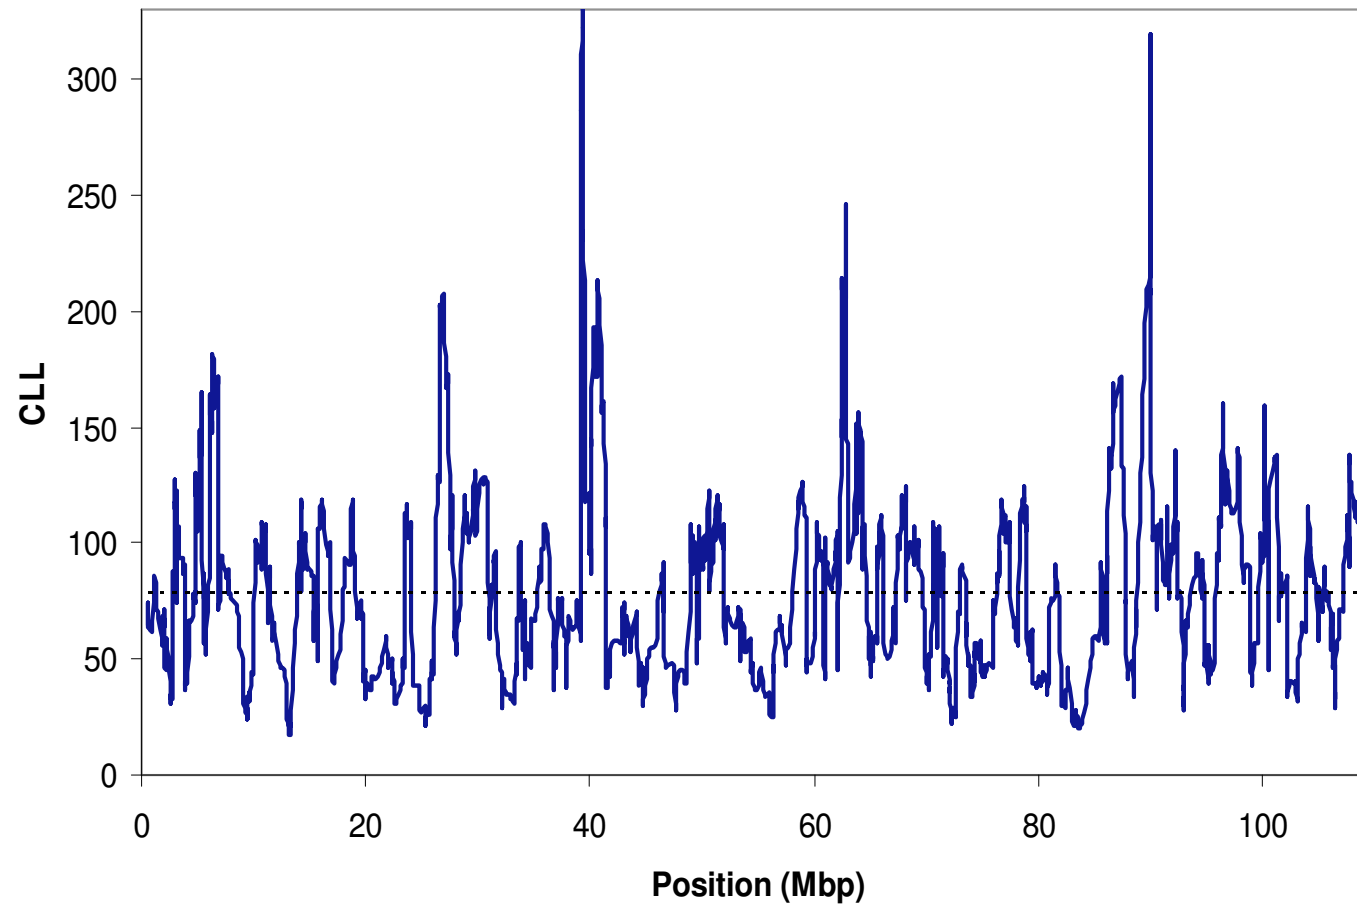

FIGURE S11.—Composite log-likelihood (CLL) for dairy breeds on BTA11. (-----  $P < 0.01$  threshold)

Supplement: FigureS11.pdf [file FigureS11.pdf]
